# Supplementary material for: Clinical Benefit of Pembrolizumab in Advanced Urothelial Cancer Patients in Real-Life Setting: An Efficacy and Safety Monocentric Study
Source: MDPI journal article supplement (doi:10.3390/curroncol29020080), 2022-02-10
Supplement: s1 [file s1]

**Supplementary Table S1. Baseline characteristics of the study population.**

| <b>Characteristic</b>                                                    | <b>No. (%)</b> |
|--------------------------------------------------------------------------|----------------|
| <b>Age – Year</b>                                                        |                |
| Median                                                                   | 73 [42 - 89]   |
| <b>Sex</b>                                                               |                |
| Female                                                                   | 21 (26.9)      |
| Male                                                                     | 57 (73.1)      |
| <b>ECOG PS score at diagnosis</b>                                        |                |
| 0                                                                        | 27 (34.6)      |
| 1                                                                        | 44 (56.4)      |
| 2                                                                        | 7 (9.0)        |
| <b>Smoking history</b>                                                   |                |
| Yes                                                                      | 51 (65.4)      |
| No                                                                       | 27 (34.6)      |
| <b>No. of Bellmunt risk factors</b>                                      |                |
| 0                                                                        | 7 (9.0)        |
| 1                                                                        | 24 (30.8)      |
| 2                                                                        | 29 (37.2)      |
| ≥3                                                                       | 18 (23.0)      |
| <b>Completion or discontinuation of most recent therapy &lt;3 months</b> | 43 (55.1)      |
| <b>Primitive location</b>                                                |                |
| Bladder                                                                  | 62 (79.5)      |
| Upper tract                                                              | 15 (19.2)      |
| Urethra                                                                  | 1 (1.3)        |
| <b>Histology</b>                                                         |                |
| Pure urothelial                                                          | 72 (92.3)      |
| Other histology variant                                                  | 6 (7.7)        |
| <b>Stage at diagnosis</b>                                                |                |
| Non-muscle invasive UC                                                   | 23 (29.5)      |
| Muscle invasive UC                                                       | 48 (61.5)      |
| Metastatic UC                                                            | 7 (9.0)        |
| <b>Previous BCG therapy</b>                                              |                |
| Yes                                                                      | 21 (25.9)      |
| No                                                                       | 57 (74.1)      |
| <b>Peri-operative chemotherapy</b>                                       |                |
| Yes                                                                      | 20 (25.6)      |
| No                                                                       | 58 (74.4)      |
| <b>Type of peri-operative chemotherapy</b>                               |                |
| MVAC                                                                     | 8 (40)         |
| Cisplatin-Gemcitabine                                                    | 7 (35)         |
| Carboplatin-Gemcitabine                                                  | 4 (20)         |
| Paclitaxel-Gemcitabine                                                   | 1 (5)          |
| <b>Post-operative chemotherapy</b>                                       |                |
| Yes                                                                      | 13 (16.7%)     |
| No                                                                       | 65 (83.3)      |
| <b>Type of post-operative chemotherapy</b>                               |                |
| MVAC                                                                     | 7 (54)         |
| Paclitaxel-Gemcitabine                                                   | 4 (31)         |
| Carboplatin-Gemcitabine                                                  | 2 (15)         |
| <b>Line of pembrolizumab as metastatic treatment</b>                     |                |
| 1                                                                        | 15 (19)        |
| 2                                                                        | 42 (54)        |

|                                                                                                                  |           |
|------------------------------------------------------------------------------------------------------------------|-----------|
| 3                                                                                                                | 12 (15)   |
| ≥4                                                                                                               | 9 (12)    |
| <b>EGOG PS score at C1</b>                                                                                       |           |
| 0                                                                                                                | 15 (19.2) |
| 1                                                                                                                | 51 (65.4) |
| 2                                                                                                                | 12 (15.4) |
| <i>Abbreviations: BCG: Bacillus Calmette-Guerin; MVAC: methotrexate, vinblastine, doxorubicin and cisplatin.</i> |           |

**Supplementary Table S2. OS status at 6 months: univariate analysis.**

|                                                    | Dead | N=30   | Alive | N=48   |                     |         |
|----------------------------------------------------|------|--------|-------|--------|---------------------|---------|
|                                                    | N    | %      | N     | %      | HR (CI 95%)         | P value |
| <b>Sex</b>                                         |      |        |       |        |                     |         |
| Female                                             | 6    | 20.00% | 15    | 31.25% | Ref.                |         |
| Male                                               | 24   | 80.00% | 33    | 68.75% | 1.71 [0.70 – 4.21]  | 0.235   |
| <b>Age 65</b>                                      |      |        |       |        |                     |         |
| ≥65 years old                                      | 22   | 73.33% | 36    | 75.00% | Ref.                |         |
| <65 years old                                      | 8    | 26.67% | 12    | 25.00% | 1.05 [0.47 – 2.36]  | 0.907   |
| <b>Smoking history</b>                             |      |        |       |        |                     | 0.867   |
| No                                                 | 8    | 26.67% | 10    | 20.83% | Ref.                |         |
| Yes                                                | 19   | 63.33% | 32    | 66.67% | 0.85 [0.37 - 1.95]  | 0.703   |
| Unknown                                            | 3    | 10.00% | 6     | 12.50% | 0.71 [0.19 – 2.68]  | 0.616   |
| <b>Cardiovascular disorders*</b>                   |      |        |       |        |                     |         |
| No                                                 | 10   | 33.33% | 20    | 41.67% | Ref.                |         |
| Yes                                                | 20   | 66.67% | 28    | 58.33% | 1.25 [0.58 – 2.67]  | 0.569   |
| <b>Former or current cancer other than urinary</b> |      |        |       |        |                     |         |
| No                                                 | 23   | 76.67% | 41    | 85.42% | Ref.                |         |
| Yes                                                | 7    | 23.33% | 7     | 14.58% | 1.54 [0.31 – 3.60]  | 0.314   |
| <b>Metabolic disorders**</b>                       |      |        |       |        |                     |         |
| No                                                 | 21   | 70.00% | 33    | 68.75% | Ref.                |         |
| Yes                                                | 9    | 30.00% | 15    | 31.25% | 0.87 [0.40 – 1.89]  | 0.724   |
| <b>Renal impairment</b>                            |      |        |       |        |                     |         |
| No                                                 | 29   | 96.67% | 45    | 93.75% | Ref.                |         |
| Yes                                                | 1    | 3.33%  | 3     | 6.25%  | 0.58 [0.08 – 4.27]  | 0.594   |
| <b>Primitive location</b>                          |      |        |       |        |                     | 0.865   |
| Bladder                                            | 25   | 83.33% | 37    | 77.08% | Ref.                |         |
| Upper tract                                        | 5    | 16.67% | 10    | 20.83% | 0.77 [0.29 – 2.00]  | 0.590   |
| Urethra                                            | 0    | 0.00%  | 1     | 2.08%  | -                   |         |
| <b>Stage at diagnosis</b>                          |      |        |       |        |                     | 0.738   |
| Non-muscle invasive UC                             | 10   | 33.33% | 13    | 27.08% | Ref.                |         |
| Muscle invasive UC                                 | 17   | 56.67% | 31    | 64.68% | 0.76 [0.35 – 1.66]  | 0.487   |
| Metastatic UC                                      | 3    | 10.00% | 4     | 8.33%  | 1.05 [0.30 – 3.82]  | 0.939   |
| <b>Histology</b>                                   |      |        |       |        |                     |         |
| Pure urothelial                                    | 28   | 93.33% | 44    | 91.67% | Ref.                |         |
| Other                                              | 2    | 6.67%  | 4     | 8.33%  | 0.72 [0.17 – 3.03]  | 0.657   |
| <b>Variant</b>                                     |      |        |       |        |                     |         |
| No                                                 | 29   | 96.67% | 45    | 93.75% | Ref.                |         |
| Yes                                                | 1    | 3.33%  | 3     | 6.25%  | 0.53 [0.07 – 3.92]  | 0.538   |
| <b>ECOG PS score at diagnosis</b>                  |      |        |       |        |                     | 0.071   |
| 0                                                  | 6    | 20.00% | 21    | 43.75% | Ref.                |         |
| 1                                                  | 20   | 66.67% | 24    | 50.00% | 2.49 [0.99 – 6.21]  | 0.050   |
| 2                                                  | 4    | 13.33% | 3     | 6.25%  | 3.87 [1.09 – 13.72] | 0.037   |
| <b>Previous BCG therapy</b>                        |      |        |       |        |                     |         |
| No                                                 | 18   | 60.00% | 39    | 81.25% | Ref.                |         |
| Yes                                                | 12   | 40.00% | 9     | 18.75% | 2.17 [1.04 – 4.51]  | 0.038   |
| <b>Perioperative chemotherapy</b>                  |      |        |       |        |                     |         |
| No                                                 | 25   | 83.33% | 34    | 70.83% | Ref.                |         |
| Yes                                                | 5    | 16.67% | 14    | 29.17% | 0.58 [0.22 – 1.51]  | 0.265   |

|                                                |      |            |      |         |                     |       |
|------------------------------------------------|------|------------|------|---------|---------------------|-------|
| <b>Schema of perioperative chemotherapy</b>    |      |            |      |         |                     | NA    |
| MVAC                                           | 4    | 80.00%     | 4    | 26.67%  |                     |       |
| Cisplatin-Gemcitabine                          | 0    | 0.00%      | 7    | 46.67%  |                     |       |
| Carboplatin-Gemcitabine                        | 1    | 20.00%     | 3    | 20.00%  |                     |       |
| Paclitaxel-Gemcitabine                         | 0    | 0.00%      | 1    | 6.67%   |                     |       |
| <b>Surgery of primitive tumor</b>              |      |            |      |         |                     |       |
| No                                             | 11   | 36.67%     | 12   | 25.00%  | Ref.                |       |
| Yes                                            | 19   | 63.33%     | 36   | 75.00%  | 0.61 [0.29 – 1.30]  | 0.204 |
| <b>Postoperative chemotherapy</b>              |      |            |      |         |                     |       |
| No                                             | 26   | 86.67%     | 39   | 81.25%  | Ref.                |       |
| Yes                                            | 4    | 13.33%     | 9    | 18.75%  | 0.62 [0.22 – 1.79]  | 0.382 |
| <b>Schema of postoperative chemotherapy</b>    |      |            |      |         |                     | NA    |
| MVAC                                           | 2    | 50.00%     | 5    | 55.56%  |                     |       |
| Carboplatin-Gemcitabine                        | 1    | 25.00%     | 1    | 11.11%  |                     |       |
| Paclitaxel-Gemcitabine                         | 1    | 25.00%     | 3    | 33.33%  |                     |       |
| <b>Type of first-line metastatic treatment</b> |      |            |      |         |                     |       |
| Chemotherapy                                   | 26   | 86.67%     | 35   | 72.92%  | Ref.                |       |
| Immunotherapy                                  | 4    | 13.33%     | 13   | 27.08%  | 0.49 [0.17 – 1.41]  | 0.185 |
| <b>First-line metastatic treatment</b>         |      |            |      |         |                     | NA    |
| MVAC                                           | 6    | 22.22%     | 12   | 31.58%  |                     |       |
| Cisplatin-Gemcitabine                          | 6    | 22.22%     | 6    | 15.79%  |                     |       |
| Carboplatin-Gemcitabine                        | 9    | 33.33%     | 10   | 26.32%  |                     |       |
| Paclitaxel-Gemcitabine                         | 4    | 14.81%     | 7    | 18.42%  |                     |       |
| Carboplatin-Paclitaxel                         | 1    | 3.70%      | 0    | 0.00%   |                     |       |
| <b>Time since most recent chemotherapy</b>     |      |            |      |         |                     |       |
| ≥3 months                                      | 10   | 33.33%     | 25   | 52.08%  | Ref.                |       |
| <3 months                                      | 20   | 66.67%     | 23   | 47.92%  | 1.85 [0.86 – 3.95]  | 0.113 |
| <b>ECOG PS score at C1</b>                     |      |            |      |         |                     | 0.071 |
| 0                                              | 3    | 10.00%     | 12   | 25.00%  | Ref.                |       |
| 1                                              | 20   | 66.67%     | 31   | 64.58%  | 2.12 [0.63 – 7.15]  | 0.224 |
| 2                                              | 7    | 23.33%     | 5    | 10.42%  | 4.49 [1.16 – 17.40] | 0.029 |
| <b>Site of metastasis at C1: Lymph node</b>    |      |            |      |         |                     |       |
| No                                             | 4    | 13.33%     | 3    | 6.25%   | Ref.                |       |
| Yes                                            | 26   | 86.67%     | 45   | 93.75%  | 0.55 [0.19 – 1.57]  | 0.261 |
| <b>Site of metastasis at C1: Lung</b>          |      |            |      |         |                     |       |
| No                                             | 17   | 56.67%     | 34   | 70.83%  | Ref.                |       |
| Yes                                            | 13   | 43.33%     | 14   | 29.17%  | 1.74 [0.84 – 3.59]  | 0.133 |
| <b>Site of metastasis at C1: Liver</b>         |      |            |      |         |                     |       |
| No                                             | 21   | 70.00%     | 43   | 89.58%  | Ref.                |       |
| Yes                                            | 9    | 30.00%     | 5    | 10.42%  | 3.15 [1.43 – 6.91]  | 0.004 |
| <b>Site of metastasis at C1: Bone</b>          |      |            |      |         |                     |       |
| No                                             | 14   | 46.67%     | 39   | 81.25%  | Ref.                |       |
| Yes                                            | 16   | 53.33%     | 9    | 18.75%  | 3.31 [1.61 – 6.80]  | 0.001 |
| <b>Site of metastasis at C1: Brain</b>         |      |            |      |         |                     | nA    |
| No                                             | 30   | 100.00%    | 47   | 97.92%  |                     |       |
| Yes                                            | 0    | 0.00%      | 1    | 2.08%   |                     |       |
| <b>Hb at C1</b>                                | 10.5 | [9.6-11.3] | 11.5 | [10-13] | 0.79 [0.62 – 0.97]  | 0.025 |



**Supplementary Table S3. PFS status at 6 months: univariate analysis.**

|                                                    | Dead | N=30   | Alive | N=48   |                     |         |
|----------------------------------------------------|------|--------|-------|--------|---------------------|---------|
|                                                    | N    | %      | N     | %      | HR (IC 95%)         | P value |
| <b>Sex</b>                                         |      |        |       |        |                     |         |
| Female                                             | 10   | 22.22% | 11    | 33.33% | Ref.                |         |
| Male                                               | 35   | 77.78% | 22    | 66.67% | 1.42 [0.70 – 2.88]  | 0.327   |
| <b>Age 65</b>                                      |      |        |       |        |                     |         |
| ≥65 years old                                      | 31   | 68.89% | 27    | 81.82% | Ref.                |         |
| <65 years old                                      | 14   | 31.11% | 6     | 18.18% | 1.55 [0.81 - 2.92]  | 0.179   |
| <b>Smoking history</b>                             |      |        |       |        |                     |         |
| No                                                 | 11   | 24.44% | 7     | 21.21% | Ref.                |         |
| Yes                                                | 28   | 62.22% | 23    | 69.70% | 0.79 [0.39 – 1.58]  | 0.502   |
| Unknown                                            | 6    | 13.33% | 3     | 9.09%  | 0.68 [0.24 – 1.97]  | 0.484   |
| <b>Cardiovascular disorders</b>                    |      |        |       |        |                     |         |
| No                                                 | 17   | 37.78% | 13    | 39.39% | Ref.                |         |
| Yes                                                | 28   | 62.22% | 20    | 60.61% | 1.18 [0.64 – 2.18]  | 0.596   |
| <b>Former or current cancer other than urinary</b> |      |        |       |        |                     |         |
| No                                                 | 36   | 80.00% | 28    | 84.85% | Ref.                |         |
| Yes                                                | 9    | 20.00% | 5     | 15.15% | 1.25 [0.60 – 2.59]  | 0.555   |
| <b>Metabolic disorders</b>                         |      |        |       |        |                     |         |
| No                                                 | 32   | 71.11% | 22    | 66.67% | Ref.                |         |
| Yes                                                | 13   | 28.89% | 11    | 33.33% | 0.76 [0.39 – 1.47]  | 0.415   |
| <b>Renal impairment</b>                            |      |        |       |        |                     |         |
| No                                                 | 43   | 95.56% | 31    | 93.94% | Ref.                |         |
| Yes                                                | 2    | 4.44%  | 2     | 6.06%  | 0.74 [0.18 – 3.07]  | 0.682   |
| <b>Primitive location</b>                          |      |        |       |        |                     | 0.868   |
| Bladder                                            | 35   | 77.78% | 27    | 81.82% | Ref.                |         |
| Upper tract                                        | 9    | 20.00% | 6     | 18.18% | 1.07 [0.51 - 2.23]  | 0.859   |
| Urethra                                            | 1    | 2.22%  | 0     | 0.00%  | 1.69 [0.23 – 12.40] | 0.607   |
| <b>Stage at diagnosis</b>                          |      |        |       |        |                     | 0.303   |
| Non-muscle invasive UC                             | 16   | 35.56% | 7     | 21.21% | Ref.                |         |
| Muscle invasive UC                                 | 26   | 57.78% | 22    | 66.67% | 0.62 [0.33 – 1.17]  | 0.139   |
| Metastatic UC                                      | 3    | 6.67%  | 4     | 12.12% | 0.57 [0.17 – 1.96]  | 0.371   |
| <b>Histology</b>                                   |      |        |       |        |                     |         |
| Pure urothelial                                    | 43   | 95.56% | 29    | 87.88% | Ref.                |         |
| Other                                              | 2    | 4.44%  | 4     | 12.12% | 0.39 [0.10 – 1.64]  | 0.202   |
| <b>Variant</b>                                     |      |        |       |        |                     |         |
| No                                                 | 44   | 97.78% | 30    | 90.91% | Ref.                |         |
| Yes                                                | 1    | 2.22%  | 3     | 9.09%  | 0.29 [0.04 – 2.12]  | 0.224   |
| <b>ECOG PS score at diagnosis</b>                  |      |        |       |        |                     | 0.407   |
| 0                                                  | 16   | 35.56% | 11    | 33.33% | Ref.                |         |
| 1                                                  | 24   | 53.33% | 20    | 60.61% | 1.10 [0.58 – 2.09]  | 0.773   |
| 2                                                  | 5    | 11.11% | 2     | 6.06%  | 1.98 [0.72 – 5.44]  | 0.188   |
| <b>Previous BCG therapy</b>                        |      |        |       |        |                     |         |
| No                                                 | 28   | 62.22% | 29    | 87.88% | Ref.                |         |
| Yes                                                | 17   | 37.78% | 4     | 12.12% | 2.38 [1.29 – 4.40]  | 0.006   |
| <b>Perioperative chemotherapy</b>                  |      |        |       |        |                     |         |
| No                                                 | 37   | 82.22% | 22    | 66.67% | Ref.                |         |
| Yes                                                | 8    | 17.78% | 11    | 33.33% | 0.66 [0.31 – 1.43]  | 0.294   |
| <b>Schema of perioperative chemotherapy</b>        |      |        |       |        |                     | NA      |

|                                                |      |            |      |            |                     |        |
|------------------------------------------------|------|------------|------|------------|---------------------|--------|
| MVAC                                           | 6    | 75.00%     | 2    | 16.67%     |                     |        |
| Cisplatin-Gemcitabine                          | 1    | 12.50%     | 6    | 50.00%     |                     |        |
| Carboplatin-Gemcitabine                        | 1    | 12.50%     | 3    | 25.00%     |                     |        |
| Paclitaxel-Gemcitabine                         | 0    | 0.00%      | 1    | 8.33%      |                     |        |
| <b>Surgery of primitive tumor</b>              |      |            |      |            |                     |        |
| No                                             | 15   | 33.33%     | 8    | 24.24%     | Ref.                |        |
| Yes                                            | 30   | 66.67%     | 25   | 75.76%     | 0.67 [0.36 – 1.26]  | 0.218  |
| <b>Postoperative chemotherapy</b>              |      |            |      |            |                     |        |
| No                                             | 37   | 82.22%     | 28   | 84.85%     | Ref.                |        |
| Yes                                            | 8    | 17.78%     | 5    | 15.15%     | 0.83 [0.37 - 1.87]  | 0.659  |
| <b>Schema of postoperative chemotherapy</b>    |      |            |      |            |                     | 0.943  |
| MVAC                                           | 5    | 62.50%     | 2    | 40.00%     | Ref.                |        |
| Carboplatin-Gemcitabine                        | 1    | 12.50%     | 1    | 20.00%     | 0.75 [0.08 – 6.76]  | 0.798  |
| Paclitaxel-Gemcitabine                         | 2    | 25.00%     | 2    | 40.00%     | 0.78 [0.14 – 4.27]  | 0.774  |
| <b>Type of first-line metastatic treatment</b> |      |            |      |            |                     |        |
| Chemotherapy                                   | 36   | 80.00%     | 25   | 75.76%     | Ref.                |        |
| Immunotherapy                                  | 9    | 20.00%     | 8    | 24.24%     | 0.78 [0.36 – 1.67]  | 0.523  |
| <b>First-line metastatic treatment</b>         |      |            |      |            |                     | NA     |
| MVAC                                           | 8    | 21.05%     | 10   | 37.04%     |                     |        |
| Cisplatin-Gemcitabine                          | 8    | 21.05%     | 4    | 14.81%     |                     |        |
| Carboplatin-Gemcitabine                        | 13   | 34.21%     | 6    | 22.22%     |                     |        |
| Paclitaxel-Gemcitabine                         | 6    | 15.79%     | 5    | 18.52%     |                     |        |
| Carboplatin-Paclitaxel                         | 1    | 2.63%      | 0    | 0.00%      |                     |        |
| <b>Time since most recent chemotherapy</b>     |      |            |      |            |                     |        |
| ≥3 months                                      | 18   | 40.00%     | 17   | 51.52%     | Ref.                |        |
| <3 months                                      | 27   | 60.00%     | 16   | 48.48%     | 1.65 [0.90 – 3.04]  | 0.105  |
| <b>ECOG PS score at C1</b>                     |      |            |      |            |                     | 0.023  |
| 0                                              | 5    | 11.11%     | 10   | 30.30%     | Ref.                |        |
| 1                                              | 31   | 68.89%     | 20   | 60.61%     | 1.94 [0.75 – 5.00]  | 0.169  |
| 2                                              | 9    | 20.00%     | 3    | 9.09%      | 4.30 [1.44 – 12.90] | 0.009  |
| <b>Site of metastasis at C1: Lymph node</b>    |      |            |      |            |                     |        |
| No                                             | 4    | 8.89%      | 3    | 9.09%      | Ref.                |        |
| Yes                                            | 41   | 91.11%     | 30   | 90.91%     | 0.81 [0.29 – 2.26]  | 0.683  |
| <b>Site of metastasis at C1: Lung</b>          |      |            |      |            |                     |        |
| No                                             | 27   | 60.00%     | 24   | 72.73%     | Ref.                |        |
| Yes                                            | 18   | 40.00%     | 9    | 27.27%     | 1.64 [0.90 – 2.98]  | 0.109  |
| <b>Site of metastasis at C1: Liver</b>         |      |            |      |            |                     |        |
| No                                             | 35   | 77.78%     | 29   | 87.88%     | Ref.                |        |
| Yes                                            | 10   | 22.22%     | 4    | 12.12%     | 1.95 [0.96 - 3.95]  | 0.064  |
| <b>Site of metastasis at C1: Bone</b>          |      |            |      |            |                     |        |
| No                                             | 24   | 53.33%     | 29   | 87.88%     | Ref.                |        |
| Yes                                            | 21   | 46.67%     | 4    | 12.12%     | 2.83 [1.55 – 5.16]  | <0.001 |
| <b>Site of metastasis at C1: Brain</b>         |      |            |      |            |                     | NA     |
| No                                             | 45   | 100.00%    | 32   | 96.97%     |                     |        |
| Yes                                            | 0    | 0.00%      | 1    | 3.03%      |                     |        |
| <b>Hb at C1</b>                                | 10.7 | [9.7-12.1] | 11.5 | [9.8-12.9] | 0.87 [0.73 – 1.03]  | 0.109  |
| <b>Hb&lt;10</b>                                |      |            |      |            |                     |        |
| No                                             | 32   | 71.11%     | 24   | 72.73%     | Ref.                |        |
